# Supplementary material for: AKAP1 Regulates Mitochondrial Dynamics during the Fatty-Acid-Promoted Maturation of Human-Induced Pluripotent Stem Cell-Derived Cardiomyocytes as Indicated by Proteomics Sequencing
Source: MDPI journal article supplement (doi:10.3390/ijms24098112), 2023-04-30
Supplement: s1 [file s1]

|               | Forward (5'to3')         | Reverse (5'to3')         |
|---------------|--------------------------|--------------------------|
| MYH7          | GAGGACAAGGTCAACACCCT     | CGCACCTTCTTCTCTTGCTC     |
| MYL3          | TCACACCTGAGCAGATTGAAGA   | GCTGGAGCATAGGCAGGAAAG    |
| TNNI1         | CAGCTCCACGAGGACTGAAC     | CTCTTCAGCAAGAGTTTGCG     |
| TNNI3         | CCTCAAGCAGGTGAAGAAGG     | CAGTAGGCAGGAAGGCTCAG     |
| TNNT2         | AGCATCTATAACTTGGAGGCAGAG | TGGAGACTTTCTGCTTATCGTTG  |
| ACOX1         | CACAAGTAAACCAGCGTGTAAG   | GTTCTTAGCCCACTCAAACAAG   |
| CACNA1C       | AGTCTCCACCCGCCACCAAG     | GCTCCTCCTCATCCTCTTCTCCTG |
| CPT1B         | CGCCGTAAACTGGACCGTGAAG   | CCGAGTGGTGTGTAACATCCTCTC |
| KCNJ4         | CTCTTCTGGTGTATCGCCTTCT   | CACGCACCGGAACCCATAG      |
| PPAR $\alpha$ | TCGGCGAGGATAGTTCTGGAAGC  | ACCACAGGATAAGTCACCGAGGAG |
| RYR2          | ACAACAGAAGCTATGCTTGGC    | GAGGAGTGTTTCGATGACCACC   |
| MFN1          | TGAGGCAGTTTGGCATCTGT     | CGCCTTCTTAGCCAGCACAA     |
| MFN2          | CAATCTGAGGCGACTGGTGA     | GTCCTGACTTCACCTTCCCG     |
| DRP1          | TGCTTCCCAGAGGTACTGGA     | CCATGTAGCAGGGTCATTTTCT   |
| AKAP1         | AGGTGGAGGCTGGTGCTGTG     | TTCTGGAGGCTCTGTGACACTGG  |

Table S1 Primer sequences for Quantitative Real-time PCR.

| <b>Antibodies</b>              | <b>Manufacturer</b> | <b>Assay</b> | <b>Dilution</b> |
|--------------------------------|---------------------|--------------|-----------------|
| Anti-SOX2                      | Proteintech         | IF           | 1:200           |
| Anti-OCT4                      | Proteintech         | IF           | 1:200           |
| Anti-cTnT                      | Proteintech         | IF           | 1:200           |
| Anti-cTnI                      | Proteintech         | IF           | 1:200           |
| Anti- $\alpha$ -actinin        | Proteintech         | IF           | 1:200           |
| Anti-Nanog                     | Proteintech         | IF           | 1:200           |
| Alexa Fluor488 anti-rabbit IgG | Beyotime            | IF           | 1:500           |
| CY3 anti-rabbit IgG            | Beyotime            | IF           | 1:500           |
| Anti-ATP5A                     | Proteintech         | WB           | 1:1000          |
| Anti-COX5B                     | Proteintech         | WB           | 1:1000          |
| WB                             | Proteintech         | WB           | 1:1000          |
| Anti-Phospho-DRP1(ser637)      | Affinity            | WB           | 1:1000          |
| Anti-AKAP1                     | Proteintech         | WB           | 1:1000          |
| Anti-MFN1                      | Proteintech         | WB           | 1:1000          |
| Anti-MFN2                      | Proteintech         | WB           | 1:1000          |
| Anti-PPAR $\alpha$             | Affinity            | WB           | 1:1000          |
| Anti-CPT1B                     | Proteintech         | WB           | 1:1000          |
| Anti- $\beta$ -actin           | ZEN-BIOSCIENCE      | WB           | 1:5000          |
| Anti-rabbit IgG                | Proteintech         | WB           | 1:5000          |
| Anti-mouse IgG                 | Proteintech         | WB           | 1:5000          |

Table S2 Antibodies information
